# Supplementary material for: Understanding the unorthodox stabilization of liquid phase exfoliated molybdenum disulfide (MoS2) in water medium
Source: Royal Society of Chemistry journal article supplement (doi:10.1039/c9cp06422b), 2019-12-11
Supplement: c9cp06422b1.pdf [file c9cp06422b1.pdf]

## Supporting Information for

### Understanding the unorthodox stabilization of Liquid Phase Exfoliated Molybdenum Disulfide (MoS<sub>2</sub>) in water medium

*Camila L.C. Rodriguez,<sup>a</sup> Pablo A. R. Muñoz,<sup>a</sup> Leandro Seixas,<sup>a</sup> Katarzyna Z. Donato,<sup>a,b</sup>*

*Ricardo. K. Donato\*<sup>a,b</sup> and Guilhermino J. M. Fchine.\**

<sup>a</sup> MackGraphe - Mackenzie Institute for Research in Graphene and Nanotechnologies, Mackenzie Presbyterian University, Rua da Consolação, 896, São Paulo, SP 01302-907, Brazil

<sup>b</sup> Institute of Macromolecular Chemistry, Academy of Sciences of the Czech Republic, Heyrovsky Sq. 2, 162 06 Prague 6, Czech Republic.

\*Corresponding authors: [donato@imc.cas.cz](mailto:donato@imc.cas.cz); [guilherminojmf@mackenzie.br](mailto:guilherminojmf@mackenzie.br)

#### Contents

Fig. S1 Raman spectroscopy of MoS<sub>2</sub> dispersions produced with different sonication times

Fig. S2 Scanning Electronic Microscopy (SEM) raw of MoS<sub>2</sub>

Fig. S3 Scanning Electronic Microscopy (SEM) MoS<sub>2</sub> nanosheets after LPE in Ac

Fig. S4 Scanning Electronic Microscopy (SEM) MoS<sub>2</sub> nanosheets after LPE in H<sub>2</sub>O

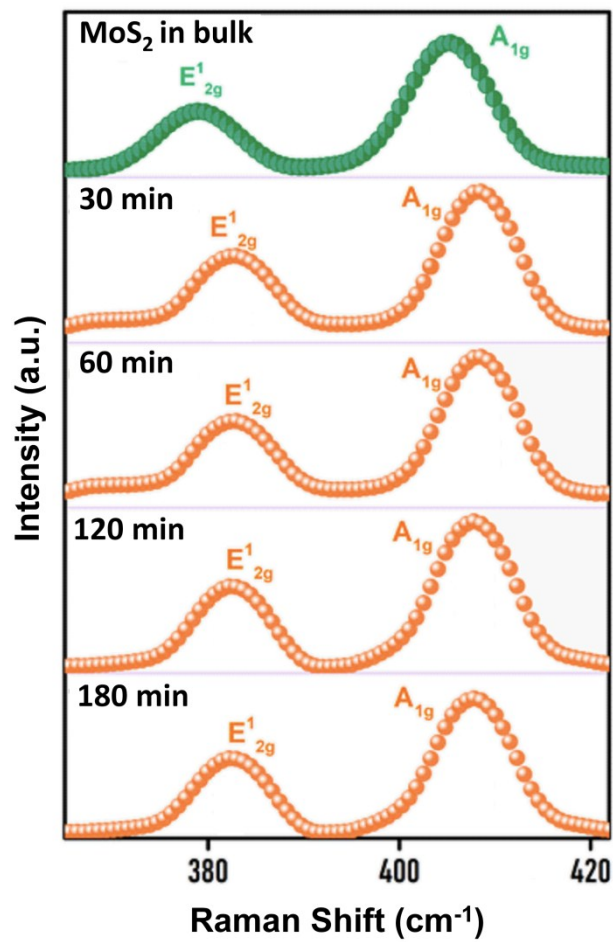

Fig. S1 Raman spectra of MoS<sub>2</sub> vibrational modes  $E_{2g}^1$  and  $A_{1g}$  present in H<sub>2</sub>O dispersions produced with different sonication times.

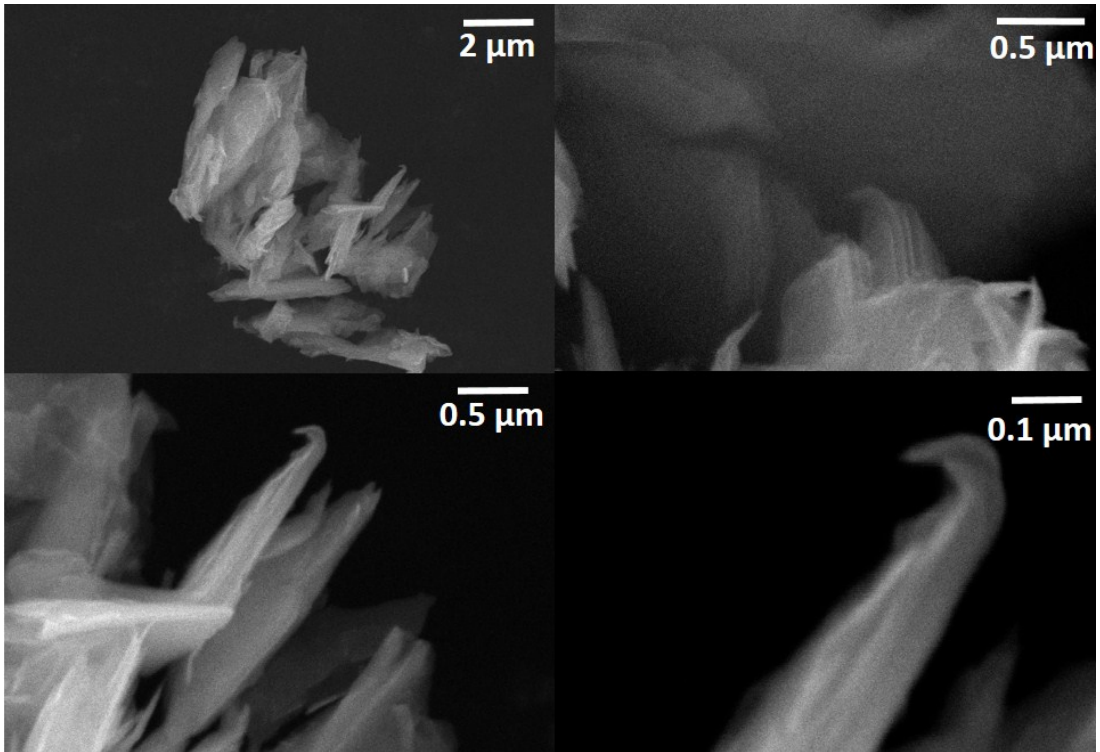

Fig. S2 Morphological characterization raw of MoS<sub>2</sub> in different magnifications (scale bars 2.0, 0.5 and 0.1 μm) where is possible to observe the crystal layers.

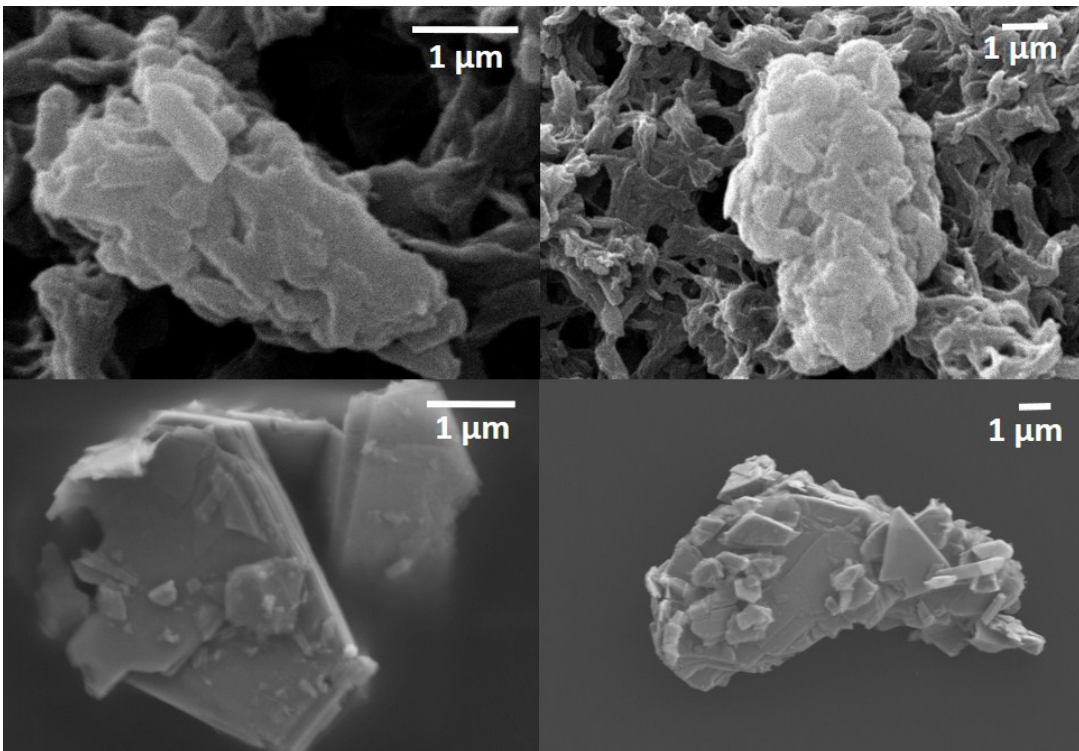

Fig. S3. Morphological characterization after LPE in Ac, these images shown the significantly damage of the MoS<sub>2</sub> crystals edges.

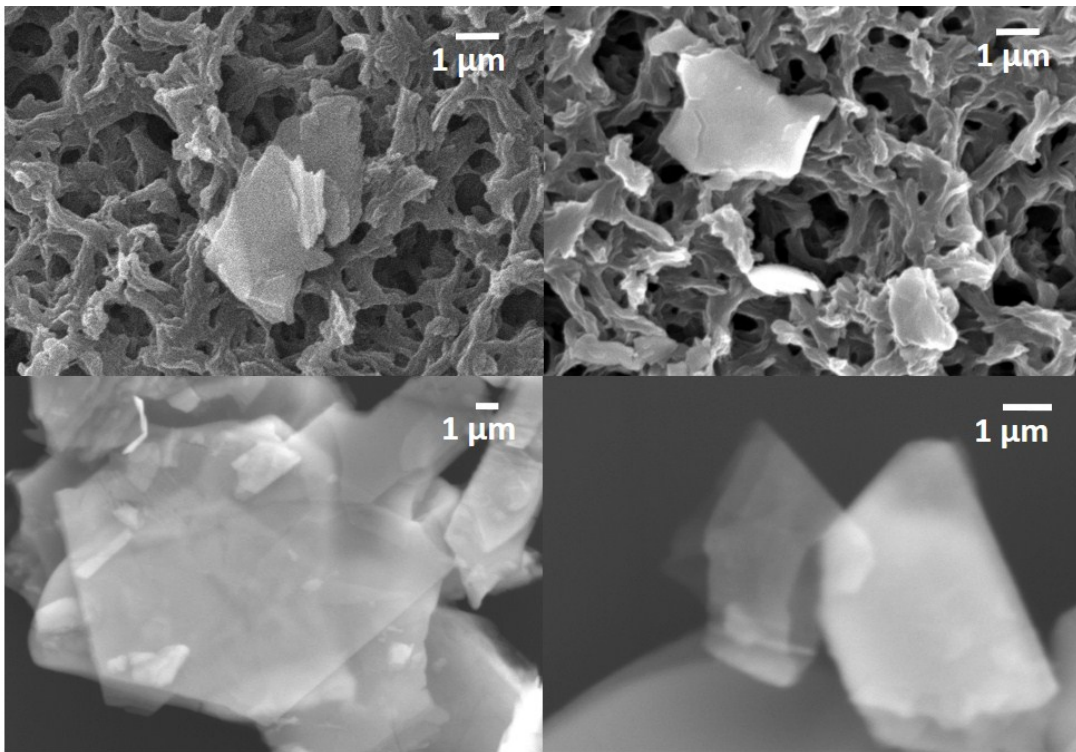

Fig. S4 Morphological characterization after LPE in H<sub>2</sub>O. These images suggest that bulk MoS<sub>2</sub> particles are successfully exfoliated and substantially fragmented.
